# Supplementary material for: SeParate: multiway fluorescence-activated droplet sorting based on integration of serial and parallel triaging concepts
Source: Royal Society of Chemistry journal article supplement (doi:10.1039/d3lc01075a), 2024-01-01
Supplement: d3lc01075a5.pdf [file d3lc01075a5.pdf]

# SeParate: Multiway fluorescence-activated droplet sorting based on integration of serial and parallel triaging concepts

Wannes Verbist,<sup>a</sup> Jolien Breukers,<sup>a</sup> Sapna Sharma,<sup>b</sup> Iene Rutten,<sup>a</sup> Hans Gerstmans,<sup>a</sup> Lotte Coelmont,<sup>b</sup>

Francesco Dal Dosso,<sup>a</sup> Kai Dallmeier<sup>b</sup> and Jeroen Lammertyn<sup>\*a</sup>

<sup>a</sup>KU Leuven, Department of Biosystems - Biosensors Group, Willem de Croylaan 42, box 2428, 3001  
Leuven, Belgium

<sup>b</sup>KU Leuven, Department of Microbiology, Immunology and Transplantation, Rega Institute,  
Laboratory of Virology and Chemotherapy, Molecular Vaccinology and Vaccine Discovery, 3000  
Leuven, Belgium

## Section S1. Microfluidic chip designs

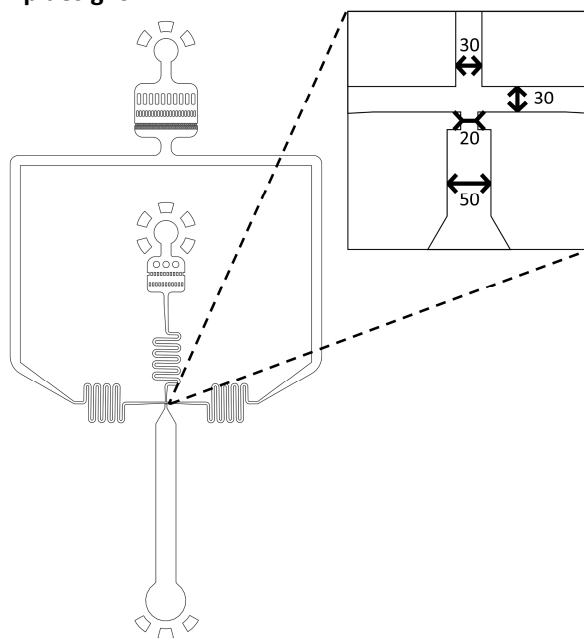

Figure S1. Microfluidic flow focusing design with dimensions depicted in  $\mu\text{m}$ .

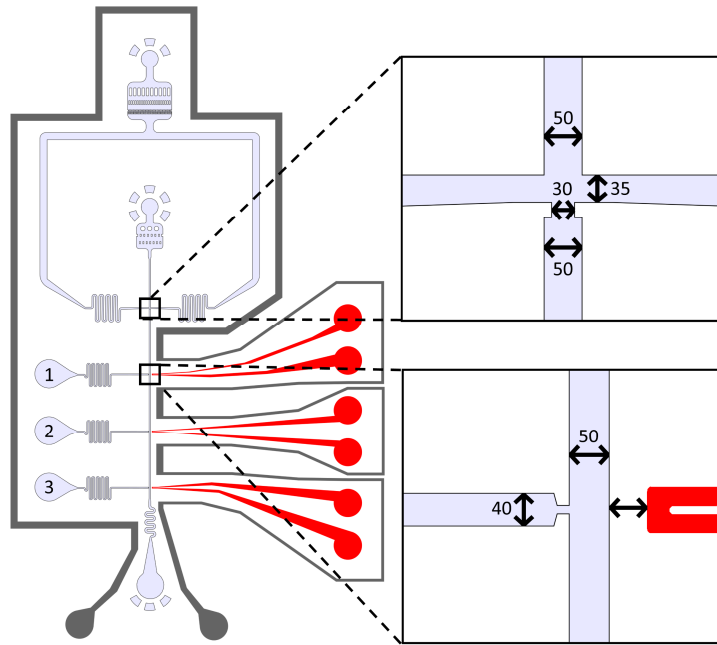

Figure S2. Picoinjection design with the most important dimensions in  $\mu\text{m}$ .

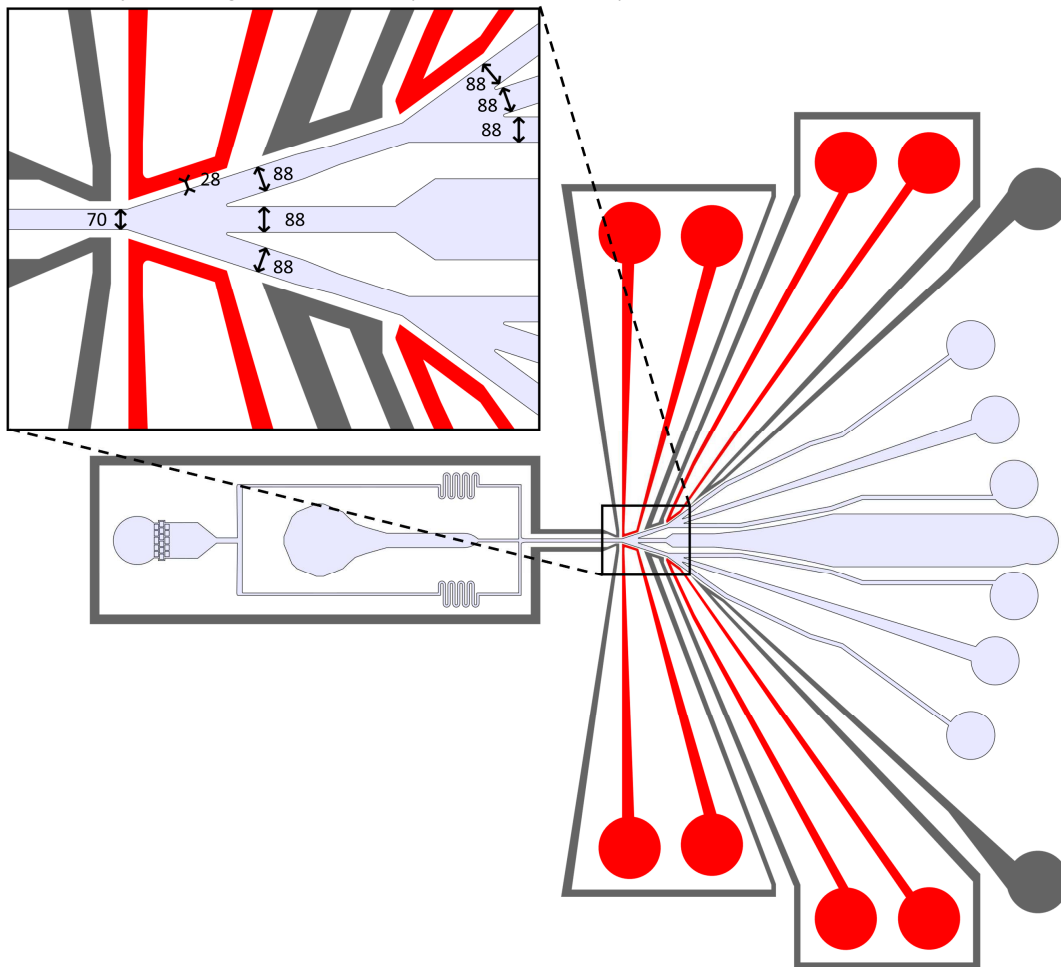

Figure S3. Microfluidic sorting design with the most important dimensions indicated in  $\mu\text{m}$ .

## Section S2. Sorting of picoinjected droplets

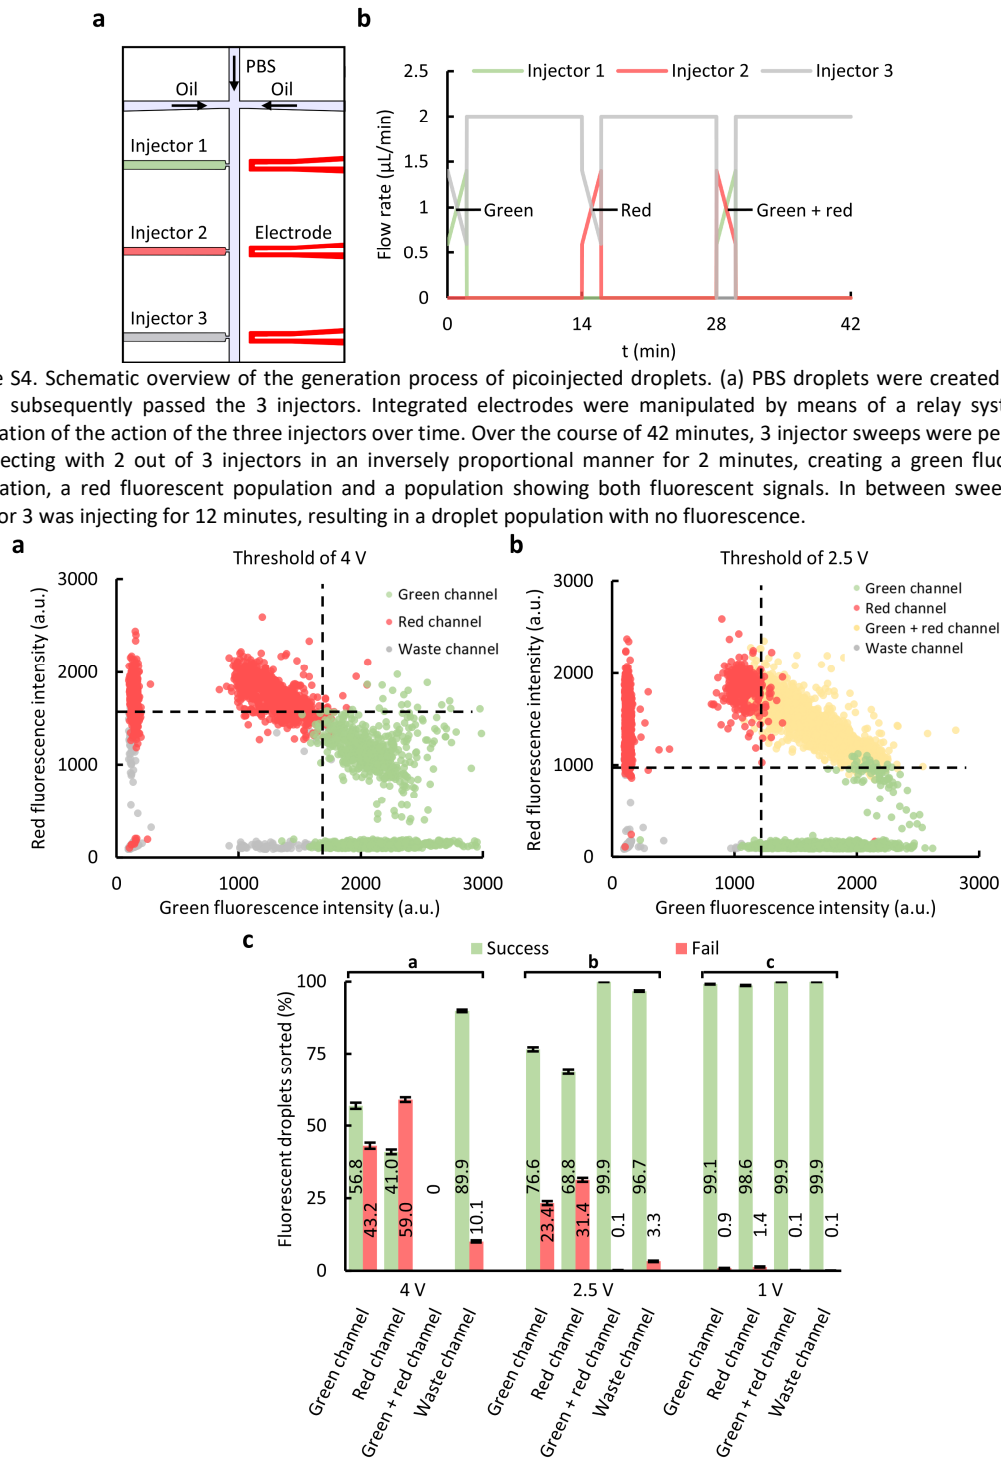

Figure S5. Sorting performance of the picoinjected droplet population for different thresholds. (a-b) The fluorescence intensities of every imaged droplet retrieved from their respective outlet. Dot colors represent the channel from which a droplet was retrieved at sorting threshold of 4 V (a) and 2.5 V (b). The dotted lines correspond to the fluorescence intensity value below which 99% of the droplets from the green and waste channel (for the horizontal line) or the red and waste channel (for the vertical line) are located. They indicate the effect the changing sorting threshold has on the sorting accuracy. (c) Sorting accuracy for all 4 channels for the 3 tested thresholds (the data for 1 V was already presented in Figure 5). Different letters above the bar indicate significant differences between the tested thresholds ( $\alpha < 0.05$ ). For every channel and condition, at least 2185 droplets were analyzed (Table S2-3). Error bars represent one standard error of the mean ( $n = 3$ ).

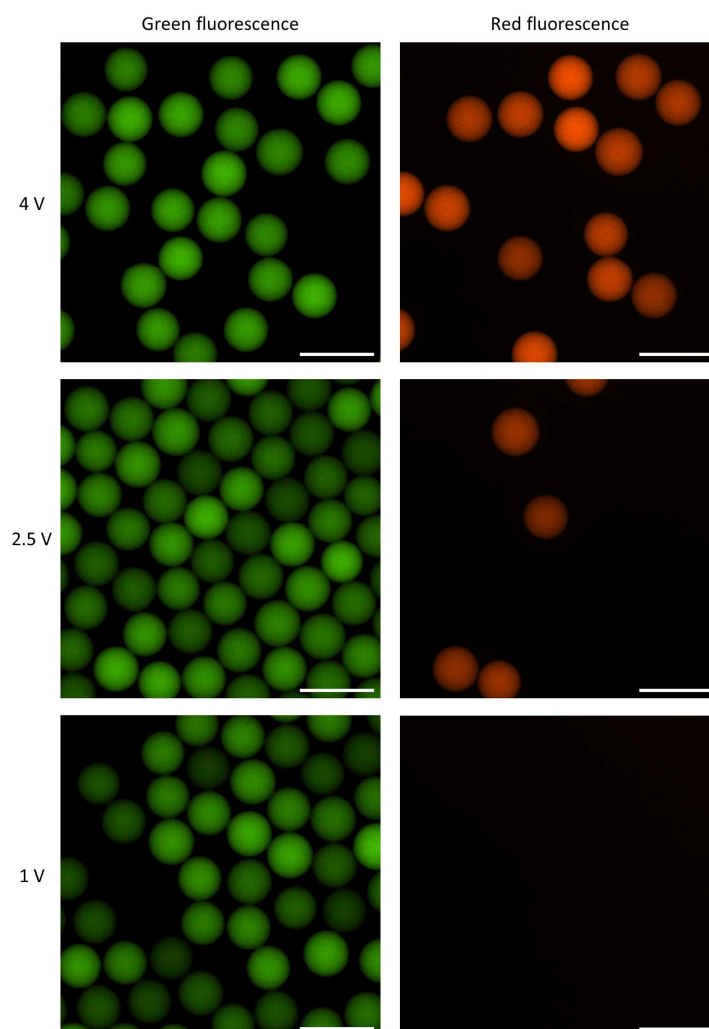

Figure S6. Green and red fluorescent widefield images of sorted picoinjected droplets for the three tested sorting thresholds (1, 2.5 and 4 V), retrieved from the green channel. Lowering the threshold to 1 V resulted in less green + red droplets in the green channel, increasing the sorting accuracy. Additionally, these images illustrate that an increase in threshold results in the lack of detection (and sorting) of low intense fluorescent droplets as for 4 V the droplets generally show a higher fluorescence intensity while for 1 V a mix between low and high fluorescence intensity droplets is observed. Scale bar = 100  $\mu\text{m}$ .

### Section S3. Sample variation in fluorescence intensity

Within one population (i.e. the whole library of droplets, existing of both fluorescent and non-fluorescent droplets), in the presented experiments, four subpopulations can be distinguished: (1) a green fluorescent subpopulation, (2) a red fluorescent subpopulation, (3) a green + red fluorescent subpopulation and an empty (non-fluorescent) subpopulation. In Figure S7a, a sample of the fluorescent bead population passing the interrogation zone over time is shown, illustrating that every bead type had its own, different, fluorescence fingerprint. However, within one subpopulation, beads showed a similar fingerprint, which simplified the determination of an optimal threshold, minimizing wrong sorting events. Figures S7b and c illustrate this for respectively picoinjected droplets and encapsulated cells. Compared to the low variation in fluorescence intensity between beads of the same type, picoinjected droplets and fluorescent cells showed higher intra-subpopulation variation in fluorescence intensity, potentially complicating accurate thresholding and sorting. These observations

are confirmed by Figure S8 as the average peak height and variation on this peak height are plotted, showing that the intra-subpopulation variation increases from beads to picoinjected droplets to cells.

Next to the cell sample showing the highest intra-subpopulation variation in fluorescence intensity, they pose an additional challenge as their fluorescence intensity is much lower compared to the other tested samples. This is reflected in the fact that a 40X short working distance was needed (instead of a more standard 20X) to capture fluorescent signals. While increasing the sensitivity, the background of the PMT measurements increased as well, which is clear from Figure S7c.

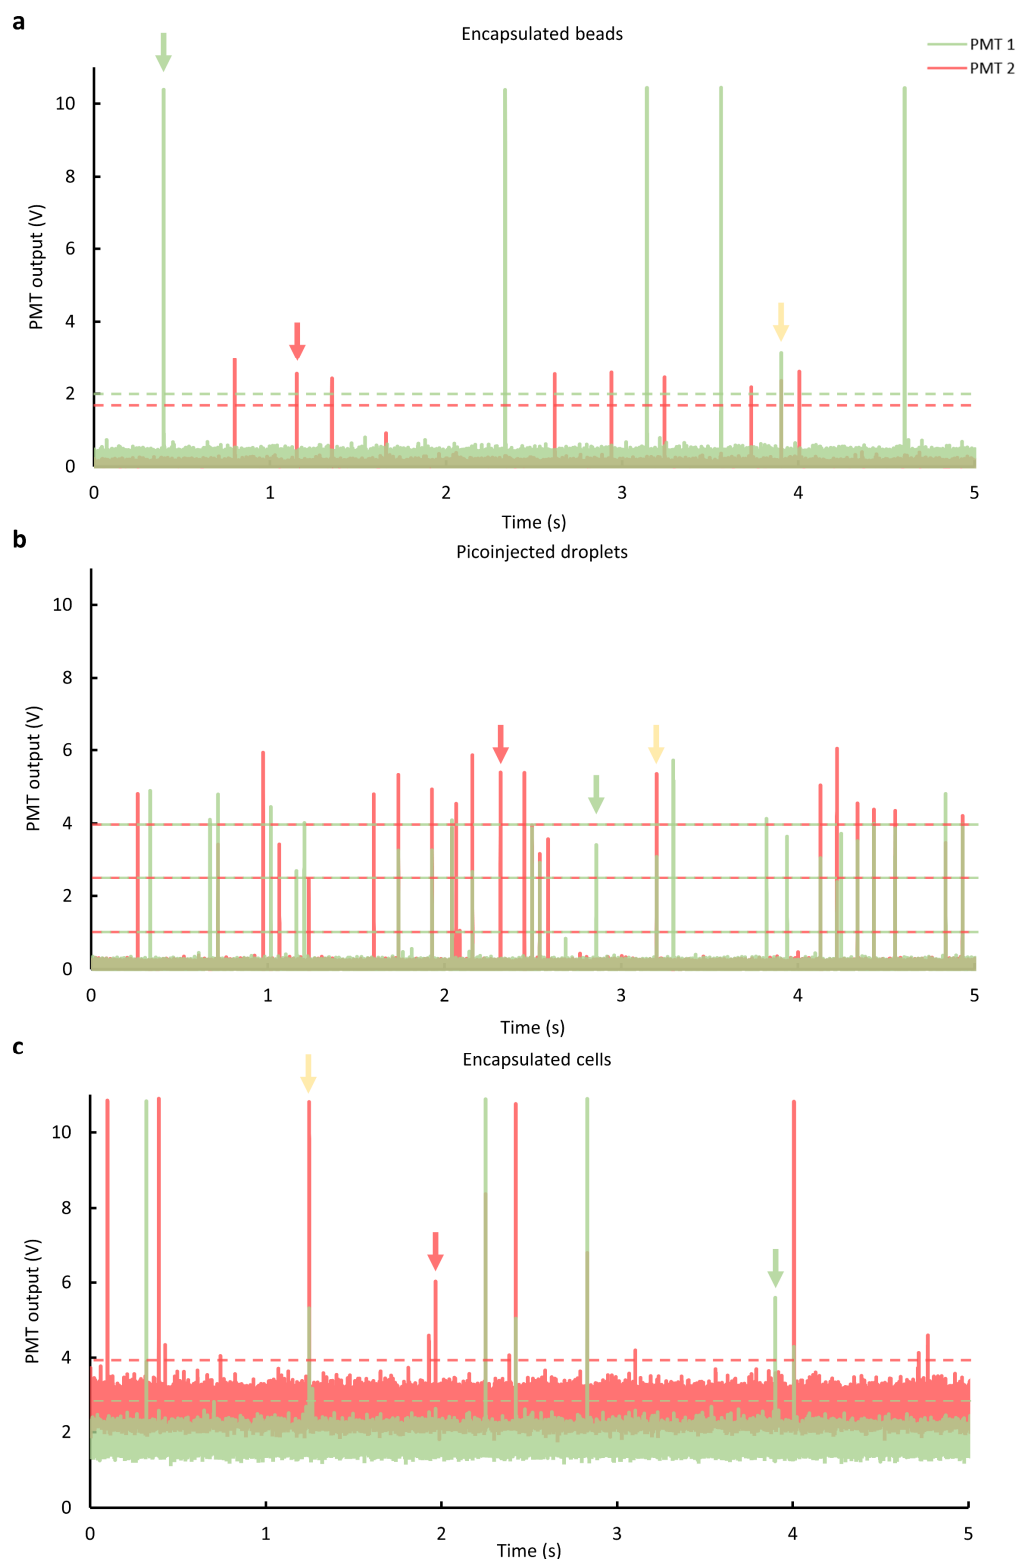

Figure S7. Recorded output signal from PMT 1 and PMT 2, depicted in green and red respectively, during the sorting process. Three peak types are visible: peaks in PMT 1 (i.e. green fluorescence), peaks in PMT 2 (i.e. red fluorescence) and in both PMTs (i.e. green + red fluorescence), indicated with respectively green, red and yellow arrows. Dotted lines represent the sorting threshold used for sorting. (a) The encapsulated mixed bead population, recorded using the 20X objective and 638 nm LP. (b) Picoinjected droplets, recorded with the 20X objective and 638 nm LP. Multiple thresholds are depicted as this population was sorted using 3 different thresholds. (c) The encapsulated cell population, recorded using the 40X objective and 590 nm LP.

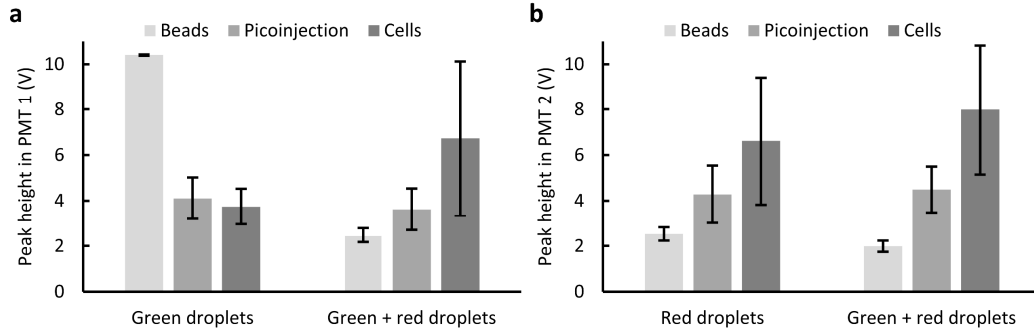

Figure S8. Average peak height as detected by the PMTs. (a) The peak heights for green and green + red droplets, as detected in PMT 1 (i.e. green fluorescent signal). For the green droplets, CV values were 0.3%, 22% and 21% for respectively beads, picoinjected droplets and cells, while the green + red droplets showed CV values of 12%, 25% and 50% for respectively beads, picoinjected droplets and cells. For green droplets, the signal in PMT 1 saturated. (b) Peak heights for red and green + red droplets detected by PMT 2 (i.e. red fluorescent signal). For the red droplets, CV values were 12%, 30% and 42% for respectively beads, picoinjected droplets and cells, while the green + red droplets showed CV values of 12%, 22% and 36% for respectively beads, picoinjected droplets and cells. Error bars indicate one standard deviation,  $n > 8$ .

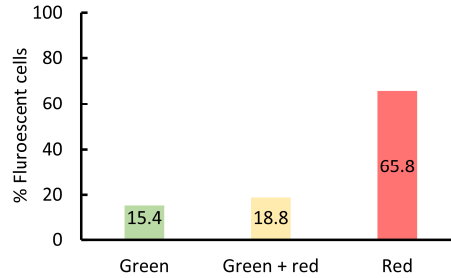

Figure S9. The relative frequency of green, green + red and red fluorescent cells, imaged prior to encapsulation.

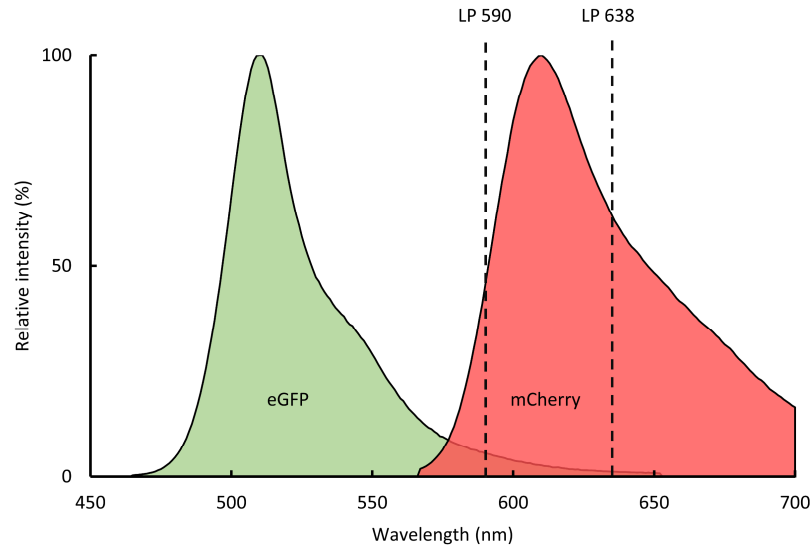

Figure S10. The emission spectra of eGFP and mCherry, the two fluorescent labels used in the cell sorting experiments. The dotted lines indicate the emission filter (for both optical setups used, 590 nm LP and 638 nm LP) positioned in front of PMT 2, letting all light above its value through to PMT 2. An eGFP tail is still observed above 590 nm, which leads to bleed-through when using the 590 nm LP, which is picked up when using a sorting threshold close to the background. Using the 638 nm LP configuration, together with the eGFP tail, the mCherry intensity peak is filtered out, leading to potential loss in sensitivity (i.e. low intense cells will not be detected).

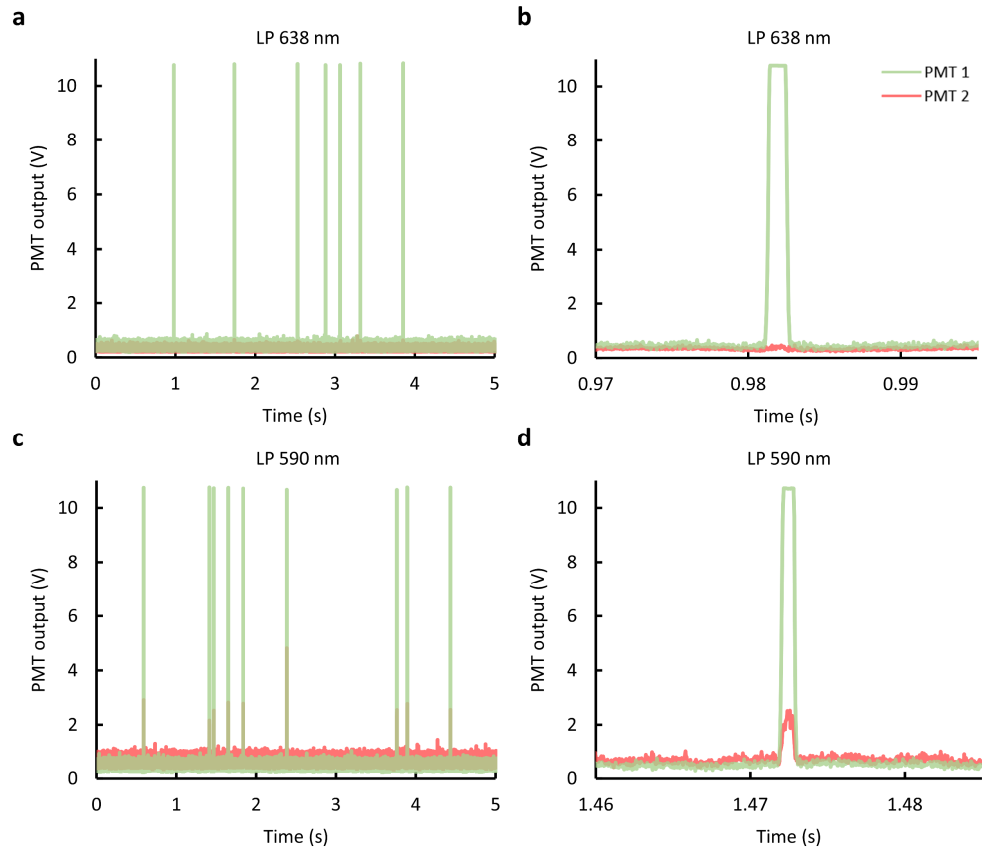

Figure S11. Recorded output of PMT 1 and 2 for green fluorescent beads in the two tested optical configurations. Every peak represents a green fluorescent bead passing by the interrogation zone. (a) Due to the more strict filtering by the 638 nm LP filter, green fluorescent beads only show in PMT 1 and not in PMT 2. (b) A zoom on one of the peaks, showing no bleed-through (i.e. no peak for PMT 2). (c) Using the 590 nm LP filter, green fluorescent beads also show small peaks in PMT 2, which could lead to wrongful identification during sorting. (d) A zoom on one of the peaks, clearly showing a peak in PMT 2 due to bleed-through.

Movie S1. An encapsulated bead gets sorted at junction 1 by electrode 1, leading to attraction to the red channel. Droplets that are not attracted flow straight into the waste channel.

Movie S2. Encapsulated bead sorting at junction 1 by electrode 3, leading to attraction to the green + red channel.

Movie S3. An encapsulated bead gets sorted at junction 2 by electrode 2, leading to attraction to the green channel.

Movie S4. A droplet arriving at junction 2 that is not attracted by an electrode, flowing to the red channel.

Table S1. The counts and sorting accuracy of sorted beads for three sorting repetitions on independent chips and the weighted average of these three repetitions.

| Initial population |       |     |             |       |         |       |               |         |       |  |
|--------------------|-------|-----|-------------|-------|---------|-------|---------------|---------|-------|--|
|                    | Green | Red | Green + red | Empty | % Green | % Red | % Green + red | % Empty | Total |  |
|                    | 104   | 95  | 18          | 5112  | 2       | 1.8   | 0.3           | 95.9    | 5329  |  |

  

| Chip 1              |       |     |             |       |         |       |               |         |       |  |
|---------------------|-------|-----|-------------|-------|---------|-------|---------------|---------|-------|--|
|                     | Green | Red | Green + red | Empty | % Green | % Red | % Green + red | % Empty | Total |  |
| Green channel       | 870   | 3   | 20          | 0     | 97.4    | 0.3   | 2.2           | 0       | 893   |  |
| Red channel         | 18    | 801 | 3           | 6     | 2.2     | 96.7  | 0.4           | 0.7     | 828   |  |
| Green + red channel | 0     | 0   | 100         | 0     | 0       | 0     | 100           | 0       | 100   |  |
| Waste               | 1     | 0   | 0           | 1712  | 0.1     | 0     | 0             | 99.9    | 1713  |  |

  

| Chip 2              |       |     |             |       |         |       |               |         |       |  |
|---------------------|-------|-----|-------------|-------|---------|-------|---------------|---------|-------|--|
|                     | Green | Red | Green + red | Empty | % Green | % Red | % Green + red | % Empty | Total |  |
| Green channel       | 787   | 5   | 19          | 2     | 96.8    | 0.6   | 2.3           | 0.2     | 813   |  |
| Red channel         | 19    | 938 | 0           | 0     | 2       | 98    | 0             | 0       | 957   |  |
| Green + red channel | 0     | 0   | 135         | 0     | 0       | 0     | 100           | 0       | 135   |  |
| Waste               | 2     | 4   | 1           | 2737  | 0.1     | 0.1   | 0             | 99.7    | 2744  |  |

  

| Chip 3              |       |     |             |       |         |       |               |         |       |  |
|---------------------|-------|-----|-------------|-------|---------|-------|---------------|---------|-------|--|
|                     | Green | Red | Green + red | Empty | % Green | % Red | % Green + red | % Empty | Total |  |
| Green channel       | 699   | 10  | 24          | 2     | 95.1    | 1.4   | 3.3           | 0.3     | 735   |  |
| Red channel         | 43    | 820 | 0           | 7     | 4.9     | 94.3  | 0             | 0.8     | 870   |  |
| Green + red channel | 0     | 0   | 120         | 0     | 0       | 0     | 100           | 0       | 120   |  |
| Waste               | 2     | 0   | 0           | 1394  | 0.1     | 0     | 0             | 99.9    | 1396  |  |

  

| Weighted average    |       |      |             |       |         |       |               |         |       |           |        |
|---------------------|-------|------|-------------|-------|---------|-------|---------------|---------|-------|-----------|--------|
|                     | Green | Red  | Green + red | Empty | % Green | % Red | % Green + red | % Empty | Total | % Success | % Fail |
| Green channel       | 2356  | 18   | 63          | 4     | 96.5    | 0.7   | 2.6           | 0.2     | 2441  | 96.5      | 3.5    |
| Red channel         | 80    | 2559 | 3           | 13    | 3       | 96.4  | 0.1           | 0.5     | 2655  | 96.4      | 3.6    |
| Green + red channel | 0     | 0    | 355         | 0     | 0       | 0     | 100           | 0       | 355   | 100       | 0      |
| Waste               | 5     | 4    | 1           | 5843  | 0.1     | 0.1   | 0             | 99.8    | 5853  | 99.8      | 0.2    |

Table S2. The counts and sorting accuracy of sorted picoinjected droplets for a threshold of 4 V and 2.5 V for three independent chips. Next to the counts, the weighted average of these three repetitions is shown.

| Initial population |       |     |             |                 |         |       |               |                   |       |  |
|--------------------|-------|-----|-------------|-----------------|---------|-------|---------------|-------------------|-------|--|
|                    | Green | Red | Green + Red | Non-fluorescent | % Green | % Red | % Green + Red | % Non-fluorescent | Total |  |
|                    | 339   | 275 | 260         | 5420            | 5.4     | 4.4   | 4.1           | 86.1              | 6294  |  |

  

| 4 V threshold |       |     |             |                 |         |       |               |                   |       |  |
|---------------|-------|-----|-------------|-----------------|---------|-------|---------------|-------------------|-------|--|
| Chip 1        | Green | Red | Green + Red | Non-fluorescent | % Green | % Red | % Green + Red | % Non-fluorescent | Total |  |
|               | 189   | 1   | 211         | 0               | 47.1    | 0.2   | 52.6          | 0.0               | 401   |  |
|               | 3     | 378 | 747         | 16              | 0.3     | 33.0  | 65.3          | 1.4               | 1144  |  |
|               | 0     | 0   | 0           | 0               | 0.0     | 0.0   | 0.0           | 0.0               | 0     |  |
|               | 48    | 42  | 30          | 903             | 4.7     | 4.1   | 2.9           | 88.3              | 1023  |  |

  

| Chip 2 | Green | Red | Green + Red | Non-fluorescent | % Green | % Red | % Green + Red | % Non-fluorescent | Total |  |
|--------|-------|-----|-------------|-----------------|---------|-------|---------------|-------------------|-------|--|
|        | 412   | 0   | 217         | 0               | 65.5    | 0.0   | 34.5          | 0.0               | 629   |  |
|        | 2     | 531 | 586         | 4               | 0.2     | 47.3  | 52.2          | 0.4               | 1123  |  |
|        | 0     | 0   | 0           | 0               | 0.0     | 0.0   | 0.0           | 0.0               | 0     |  |
|        | 121   | 110 | 65          | 2035            | 5.2     | 4.7   | 2.8           | 87.3              | 2331  |  |

  

| Chip 3 | Green | Red | Green + Red | Non-fluorescent | % Green | % Red | % Green + Red | % Non-fluorescent | Total |  |
|--------|-------|-----|-------------|-----------------|---------|-------|---------------|-------------------|-------|--|
|        | 641   | 0   | 514         | 0               | 55.5    | 0.0   | 44.5          | 0.0               | 1155  |  |
|        | 0     | 490 | 645         | 9               | 0.0     | 42.8  | 56.4          | 0.8               | 1144  |  |
|        | 0     | 0   | 0           | 0               | 0.0     | 0.0   | 0.0           | 0.0               | 0     |  |
|        | 79    | 42  | 13          | 1940            | 3.8     | 2.0   | 0.6           | 93.5              | 2074  |  |

  

| Weighted average    |       |      |             |                 |         |       |               |                   |       |                  |
|---------------------|-------|------|-------------|-----------------|---------|-------|---------------|-------------------|-------|------------------|
|                     | Green | Red  | Green + Red | Non-fluorescent | % Green | % Red | % Green + Red | % Non-fluorescent | Total | % Success % Fail |
| Green channel       | 1242  | 1    | 942         | 0               | 56.8    | 0.0   | 43.1          | 0.0               | 2185  | 56.8 43.2        |
| Red channel         | 5     | 1399 | 1978        | 29              | 0.1     | 41.0  | 58.0          | 0.9               | 3411  | 41.0 59.0        |
| Green + red channel | 0     | 0    | 0           | 0               | 0.0     | 0.0   | 0.0           | 0.0               | 0     | 0.0 0.0          |
| Waste channel       | 248   | 194  | 108         | 4878            | 4.6     | 3.6   | 2.0           | 89.9              | 5428  | 89.9 10.1        |

  

| 2.5 V threshold |       |      |             |                 |         |       |               |                   |       |  |
|-----------------|-------|------|-------------|-----------------|---------|-------|---------------|-------------------|-------|--|
| Chip 1          | Green | Red  | Green + Red | Non-fluorescent | % Green | % Red | % Green + Red | % Non-fluorescent | Total |  |
|                 | 694   | 6    | 493         | 0               | 58.2    | 0.5   | 41.3          | 0.0               | 1193  |  |
|                 | 11    | 1045 | 803         | 3               | 0.6     | 56.1  | 43.1          | 0.2               | 1862  |  |
|                 | 0     | 0    | 650         | 0               | 0.0     | 0.0   | 100.0         | 0.0               | 650   |  |
|                 | 25    | 30   | 12          | 1649            | 1.5     | 1.7   | 0.7           | 96.1              | 1716  |  |

  

| Chip 2 | Green | Red | Green + Red | Non-fluorescent | % Green | % Red | % Green + Red | % Non-fluorescent | Total |  |
|--------|-------|-----|-------------|-----------------|---------|-------|---------------|-------------------|-------|--|
|        | 1228  | 2   | 303         | 2               | 80.0    | 0.1   | 19.7          | 0.1               | 1535  |  |
|        | 3     | 572 | 215         | 4               | 0.4     | 72.0  | 27.1          | 0.5               | 794   |  |
|        | 0     | 0   | 675         | 4               | 0.0     | 0.0   | 99.4          | 0.6               | 679   |  |
|        | 31    | 29  | 1           | 1429            | 2.1     | 1.9   | 0.1           | 95.9              | 1490  |  |

  

| Chip 3 | Green | Red  | Green + Red | Non-fluorescent | % Green | % Red | % Green + Red | % Non-fluorescent | Total |  |
|--------|-------|------|-------------|-----------------|---------|-------|---------------|-------------------|-------|--|
|        | 936   | 0    | 66          | 1               | 93.3    | 0.0   | 6.6           | 0.1               | 1003  |  |
|        | 1     | 1249 | 268         | 2               | 0.1     | 82.2  | 17.6          | 0.1               | 1520  |  |
|        | 0     | 0    | 1348        | 0               | 0.0     | 0.0   | 100.0         | 0.0               | 1348  |  |
|        | 11    | 8    | 0           | 1204            | 0.9     | 0.7   | 0.0           | 98.4              | 1223  |  |

  

| Weighted average    |       |      |             |                 |         |       |               |                   |       |                  |
|---------------------|-------|------|-------------|-----------------|---------|-------|---------------|-------------------|-------|------------------|
|                     | Green | Red  | Green + Red | Non-fluorescent | % Green | % Red | % Green + Red | % Non-fluorescent | Total | % Success % Fail |
| Green channel       | 2858  | 8    | 862         | 3               | 76.6    | 0.2   | 23.1          | 0.1               | 3731  | 76.6 23.4        |
| Red channel         | 15    | 2866 | 1286        | 9               | 0.4     | 68.6  | 30.8          | 0.2               | 4176  | 68.6 31.4        |
| Green + red channel | 0     | 0    | 2673        | 4               | 0.0     | 0.0   | 99.9          | 0.1               | 2677  | 99.9 0.1         |
| Waste channel       | 67    | 67   | 13          | 4282            | 1.5     | 1.5   | 0.3           | 96.7              | 4429  | 96.7 3.3         |

Table S3. The counts and sorting accuracy of sorted picoinjected droplets for a threshold of 1 V for three independent chips. Next to the counts, the weighted average of these three repetitions is shown. The starting population was the same as depicted in Table S2.

| 1 V threshold       |                     |       |             |                 |                 |         |               |                   |                   |           |        |  |
|---------------------|---------------------|-------|-------------|-----------------|-----------------|---------|---------------|-------------------|-------------------|-----------|--------|--|
| Chip 1              |                     | Green | Red         | Green + Red     | Non-fluorescent | % Green | % Red         | % Green + Red     | % Non-fluorescent | Total     |        |  |
|                     | Green channel       | 952   | 1           | 8               | 0               | 99.1    | 0.1           | 0.8               | 0.0               | 961       |        |  |
|                     | Red channel         | 27    | 1238        | 1               | 1               | 2.1     | 97.7          | 0.1               | 0.1               | 1267      |        |  |
|                     | Green + red channel | 1     | 0           | 399             | 0               | 0.3     | 0.0           | 99.8              | 0.0               | 400       |        |  |
|                     | Waste channel       | 1     | 0           | 1               | 1533            | 0.1     | 0.0           | 0.1               | 99.9              | 1535      |        |  |
|                     |                     |       |             |                 |                 |         |               |                   |                   |           |        |  |
| Chip 2              |                     | Green | Red         | Green + Red     | Non-fluorescent | % Green | % Red         | % Green + Red     | % Non-fluorescent | Total     |        |  |
|                     | Green channel       | 1731  | 12          | 10              | 0               | 98.7    | 0.7           | 0.6               | 0.0               | 1753      |        |  |
|                     | Red channel         | 11    | 1332        | 1               | 7               | 0.8     | 98.6          | 0.1               | 0.5               | 1351      |        |  |
|                     | Green + red channel | 0     | 0           | 1131            | 2               | 0.0     | 0.0           | 99.8              | 0.2               | 1133      |        |  |
|                     | Waste channel       | 0     | 0           | 0               | 1846            | 0.0     | 0.0           | 0.0               | 100.0             | 1846      |        |  |
|                     |                     |       |             |                 |                 |         |               |                   |                   |           |        |  |
| Chip 3              |                     | Green | Red         | Green + Red     | Non-fluorescent | % Green | % Red         | % Green + Red     | % Non-fluorescent | Total     |        |  |
|                     | Green channel       | 800   | 0           | 1               | 0               | 99.9    | 0.0           | 0.1               | 0.0               | 801       |        |  |
|                     | Red channel         | 1     | 1069        | 0               | 1               | 0.1     | 99.8          | 0.0               | 0.1               | 1071      |        |  |
|                     | Green + red channel | 1     | 0           | 1148            | 0               | 0.1     | 0.0           | 99.9              | 0.0               | 1149      |        |  |
|                     | Waste channel       | 0     | 1           | 2               | 1357            | 0.0     | 0.1           | 0.1               | 99.8              | 1360      |        |  |
|                     |                     |       |             |                 |                 |         |               |                   |                   |           |        |  |
| Weighted average    |                     |       |             |                 |                 |         |               |                   |                   |           |        |  |
|                     | Green               | Red   | Green + Red | Non-fluorescent | % Green         | % Red   | % Green + Red | % Non-fluorescent | Total             | % Success | % Fail |  |
| Green channel       | 3483                | 13    | 19          | 0               | 99.1            | 0.4     | 0.5           | 0.0               | 3515              | 99.1      | 0.9    |  |
| Red channel         | 39                  | 3639  | 2           | 9               | 1.1             | 98.6    | 0.1           | 0.2               | 3689              | 98.6      | 1.4    |  |
| Green + red channel | 2                   | 0     | 2678        | 2               | 0.1             | 0.0     | 99.9          | 0.1               | 2682              | 99.9      | 0.1    |  |
| Waste channel       | 1                   | 1     | 3           | 4736            | 0.0             | 0.0     | 0.1           | 99.9              | 4741              | 99.9      | 0.1    |  |

Table S4. The counts and sorting accuracy of sorted cells for three sorting repetitions on independent chips and the weighted average of these three repetitions for the optical setups using 638 nm LP.

| Initial population |  |       |     |             |       |         |       |               |         |       |
|--------------------|--|-------|-----|-------------|-------|---------|-------|---------------|---------|-------|
|                    |  | Green | Red | Green + red | Empty | % Green | % Red | % Green + Red | % Empty | Total |
|                    |  | 10    | 57  | 10          | 2656  | 0.4     | 2.1   | 0.4           | 97.2    | 2733  |

| LP 638 |                     |       |     |             |       |         |       |               |         |       |
|--------|---------------------|-------|-----|-------------|-------|---------|-------|---------------|---------|-------|
| Chip 1 |                     | Green | Red | Green + red | Empty | % Green | % Red | % Green + Red | % Empty | Total |
|        | Green channel       | 307   | 0   | 90          | 17    | 74.2    | 0.0   | 21.7          | 4.1     | 414   |
|        | Red channel         | 3     | 674 | 2           | 3     | 0.4     | 98.8  | 0.3           | 0.4     | 682   |
|        | Green + red channel | 0     | 2   | 218         | 0     | 0.0     | 0.9   | 99.1          | 0.0     | 220   |
|        | Waste channel       | 0     | 13  | 0           | 1112  | 0.0     | 1.2   | 0.0           | 98.8    | 1125  |

| Chip 2 |                     | Green | Red  | Green + red | Empty | % Green | % Red | % Green + Red | % Empty | Total |
|--------|---------------------|-------|------|-------------|-------|---------|-------|---------------|---------|-------|
|        | Green channel       | 360   | 18   | 155         | 14    | 65.8    | 3.3   | 28.3          | 2.6     | 547   |
|        | Red channel         | 1     | 1193 | 2           | 1     | 0.1     | 99.7  | 0.2           | 0.1     | 1197  |
|        | Green + red channel | 6     | 12   | 519         | 5     | 1.1     | 2.2   | 95.8          | 0.9     | 542   |
|        | Waste channel       | 1     | 33   | 3           | 1437  | 0.1     | 2.2   | 0.2           | 97.5    | 1474  |

| Chip 3 |                     | Green | Red  | Green + red | Empty | % Green | % Red | % Green + Red | % Empty | Total |
|--------|---------------------|-------|------|-------------|-------|---------|-------|---------------|---------|-------|
|        | Green channel       | 428   | 4    | 138         | 36    | 70.6    | 0.7   | 22.8          | 5.9     | 606   |
|        | Red channel         | 0     | 1489 | 2           | 15    | 0.0     | 98.9  | 0.1           | 1.0     | 1506  |
|        | Green + red channel | 5     | 6    | 667         | 6     | 0.7     | 0.9   | 97.5          | 0.9     | 684   |
|        | Waste channel       | 0     | 9    | 0           | 1006  | 0.0     | 0.9   | 0.0           | 99.1    | 1015  |

| Weighted average    |  |       |      |             |       |         |       |               |         |       |           |        |
|---------------------|--|-------|------|-------------|-------|---------|-------|---------------|---------|-------|-----------|--------|
|                     |  | Green | Red  | Green + red | Empty | % Green | % Red | % Green + Red | % Empty | Total | % Success | % Fail |
| Green channel       |  | 1095  | 22   | 383         | 67    | 69.9    | 1.4   | 24.4          | 4.3     | 1567  | 69.9      | 30.1   |
| Red channel         |  | 4     | 3356 | 6           | 19    | 0.1     | 99.1  | 0.2           | 0.6     | 3385  | 99.1      | 0.9    |
| Green + red channel |  | 11    | 20   | 1404        | 11    | 0.8     | 1.4   | 97.1          | 0.8     | 1446  | 97.1      | 2.9    |
| Waste channel       |  | 1     | 55   | 3           | 3555  | 0.0     | 1.5   | 0.1           | 98.4    | 3614  | 98.4      | 1.6    |

Table S5. The counts and sorting accuracy of sorted cells for three sorting repetitions on independent chips and the weighted average of these three repetitions for the optical setups using 590 nm LP. The starting population was the same as depicted in Table S4.

| LP 590              |                     |       |             |             |         |         |               |               |         |           |        |  |
|---------------------|---------------------|-------|-------------|-------------|---------|---------|---------------|---------------|---------|-----------|--------|--|
| Chip 1              |                     | Green | Red         | Green + red | Empty   | % Green | % Red         | % Green + Red | % Empty | Total     |        |  |
|                     | Green channel       | 265   | 0           | 0           | 13      | 95.3    | 0.0           | 0.0           | 4.7     | 278       |        |  |
|                     | Red channel         | 1     | 1080        | 0           | 9       | 0.1     | 99.1          | 0.0           | 0.8     | 1090      |        |  |
|                     | Green + red channel | 22    | 0           | 98          | 2       | 18.0    | 0.0           | 80.3          | 1.6     | 122       |        |  |
|                     | Waste channel       | 0     | 3           | 3           | 1673    | 0.0     | 0.2           | 0.2           | 99.6    | 1679      |        |  |
|                     |                     |       |             |             |         |         |               |               |         |           |        |  |
| Chip 2              |                     | Green | Red         | Green + red | Empty   | % Green | % Red         | % Green + Red | % Empty | Total     |        |  |
|                     | Green channel       | 566   | 15          | 1           | 29      | 92.6    | 2.5           | 0.2           | 4.7     | 611       |        |  |
|                     | Red channel         | 0     | 1217        | 1           | 51      | 0.0     | 95.9          | 0.1           | 4.0     | 1269      |        |  |
|                     | Green + red channel | 146   | 14          | 991         | 13      | 12.5    | 1.2           | 85.1          | 1.1     | 1164      |        |  |
|                     | Waste channel       | 0     | 9           | 2           | 1080    | 0.0     | 0.8           | 0.2           | 99.0    | 1091      |        |  |
|                     |                     |       |             |             |         |         |               |               |         |           |        |  |
| Chip 3              |                     | Green | Red         | Green + red | Empty   | % Green | % Red         | % Green + Red | % Empty | Total     |        |  |
|                     | Green channel       | 390   | 4           | 8           | 25      | 91.3    | 0.9           | 1.9           | 5.9     | 427       |        |  |
|                     | Red channel         | 1     | 1291        | 2           | 60      | 0.1     | 95.3          | 0.1           | 4.4     | 1354      |        |  |
|                     | Green + red channel | 101   | 14          | 791         | 24      | 10.9    | 1.5           | 85.1          | 2.6     | 930       |        |  |
|                     | Waste channel       | 0     | 0           | 0           | 884     | 0.0     | 0.0           | 0.0           | 100.0   | 884       |        |  |
|                     |                     |       |             |             |         |         |               |               |         |           |        |  |
| Weighted average    |                     |       |             |             |         |         |               |               |         |           |        |  |
|                     | Green               | Red   | Green + red | Empty       | % Green | % Red   | % Green + Red | % Empty       | Total   | % Success | % Fail |  |
| Green channel       | 1221                | 19    | 9           | 67          | 92.8    | 1.4     | 0.7           | 5.1           | 1316    | 92.8      | 7.2    |  |
| Red channel         | 2                   | 3588  | 3           | 120         | 0.1     | 96.6    | 0.1           | 3.2           | 3713    | 96.6      | 3.4    |  |
| Green + red channel | 269                 | 28    | 1880        | 39          | 12.1    | 1.3     | 84.8          | 1.8           | 2216    | 84.8      | 15.2   |  |
| Waste channel       | 0                   | 12    | 5           | 3637        | 0.0     | 0.3     | 0.1           | 99.5          | 3654    | 99.5      | 0.5    |  |
